# Supplementary material
Source: Royal Society of Chemistry journal article supplement (doi:10.1039/d6lc00165c)
Supplement: d6lc00165c2.pdf [file d6lc00165c2.pdf]

*Supplementary information for*

**Capillary Flow-Driven Paper-Based Microfluidic Sensor for NDMA Detection in Water**

Prakash Aryal<sup>1</sup>, Jade Manna-rubenstein<sup>1</sup>, Tessa Whitaker<sup>1</sup>, Eric Brack<sup>2</sup>, Charles S. Henry<sup>1\*</sup>

<sup>1</sup>*Department of Chemistry, Colorado State University, Fort Collins, CO, 80523, USA*

<sup>1</sup>*U.S. Army Combat Capabilities Development Command (DEVCOM)—Soldier Center, Natick, Massachusetts 01760, United States*

**\*Corresponding author:**

E-mail address: [Chuck.henry@colostate.edu](mailto:Chuck.henry@colostate.edu) (C.S. Henry)

**Table of Contents**

|                                                                                    |         |
|------------------------------------------------------------------------------------|---------|
| Movie S1.....                                                                      | Page S2 |
| Figure S1. <b>Channel optimization for image analysis</b> .....                    | Page S2 |
| Figure S2. <b>Sensor's compatibility with smartphone-based systems</b> .....       | Page S2 |
| Figure S3. <b>Channel width optimization</b> .....                                 | Page S3 |
| Figure S4. <b>Channel height optimization</b> .....                                | Page S3 |
| Figure S5. <b>Paper substrate optimization</b> .....                               | Page S4 |
| Figure S6. <b>Sensor's greenness report</b> .....                                  | Page S4 |
| Table S1. <b>Criteria and justification for the AGREE score</b> .....              | Page S5 |
| Table S2. <b>Physical and fluidic characteristics of substrates tested</b> .....   | Page S5 |
| Figure S7. <b>Image quantification workflow for the NDMA sensor</b> .....          | Page S6 |
| Table S3. <b>Intra and inter device variability in the developed system.</b> ..... | Page S6 |

**Movie S1.** Working mechanism of the sensor

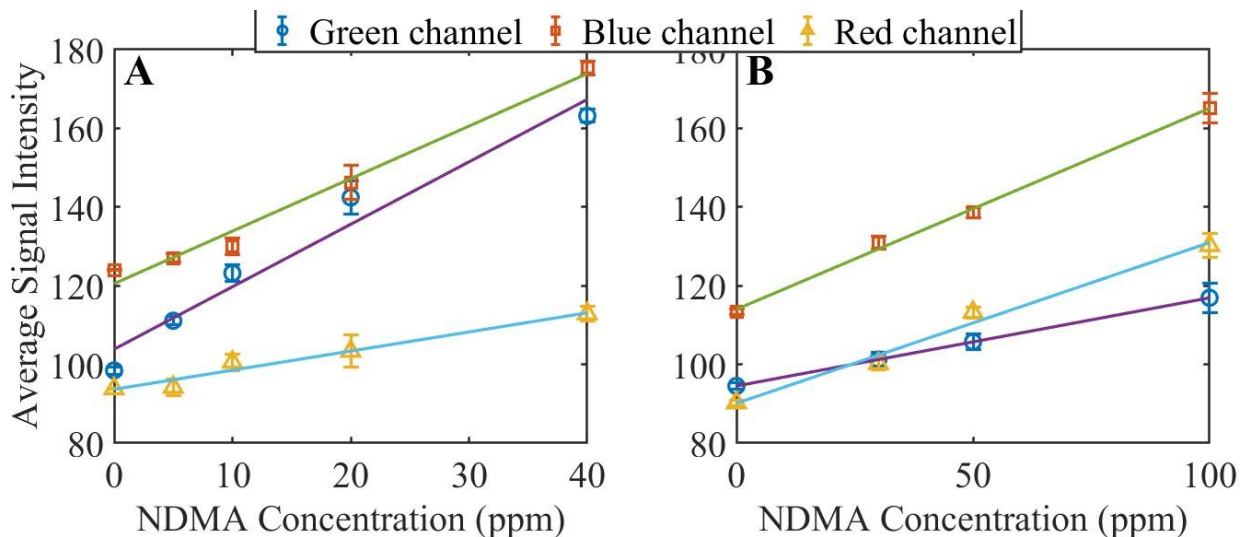

**Figure S1.** Image analysis color-channel selection for NDMA detection. Images were analyzed using ImageJ and separated into red, green, and blue (RGB) color channels. For NDMA–Co assays (A), the green channel was selected, while for NDMA–Fe assays (B), the blue channel was used, as these channels exhibited the highest sensitivity for their respective reactions.

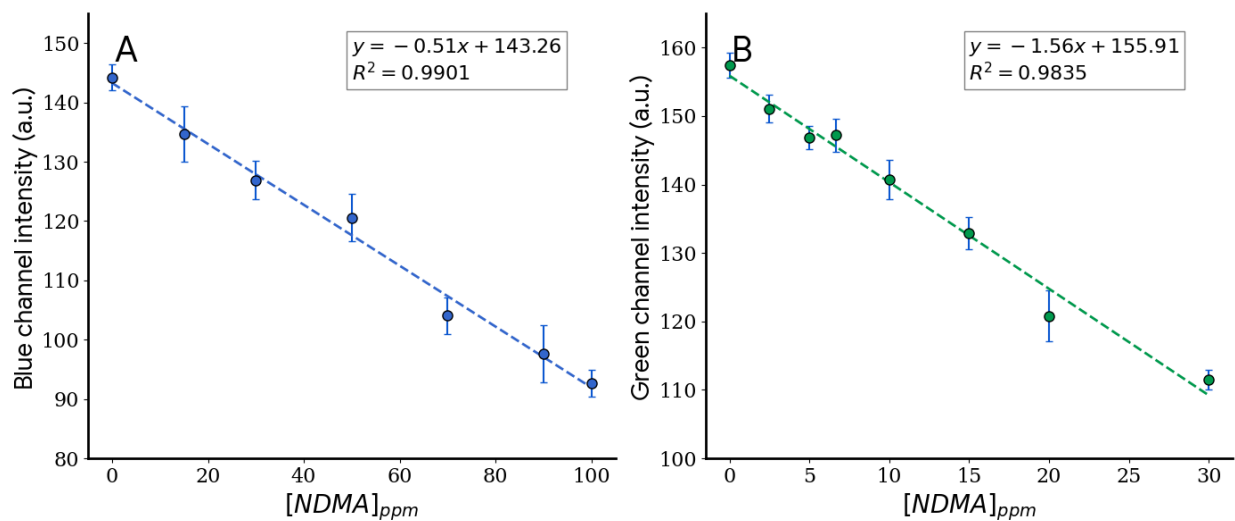

**Figure S2.** Sensor's compatibility with smartphone-based system (RGB color detector smartphone app). A = Fe<sup>2+</sup> based system, B = Co<sup>2+</sup> based system.

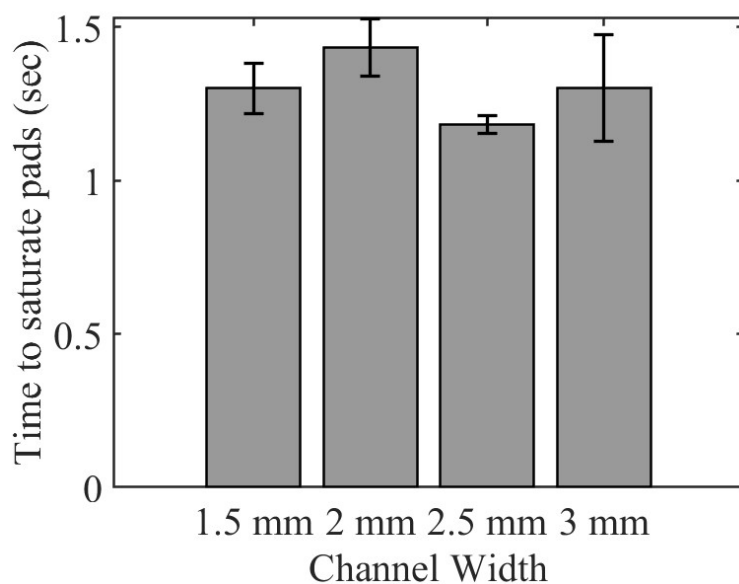

**Figure S3.** Channel width optimization for the capillary flow-driven microfluidic device. Average flow performance metrics (mean  $\pm$  SD) are shown for channel widths of 1.5, 2.0, 2.5, and 3.0 mm, demonstrating that a channel width of 2.5 mm provides the most consistent and reliable flow behavior and was therefore selected for subsequent device fabrication and testing. The replicate measurement seconds were rounded to the nearest 0.5.

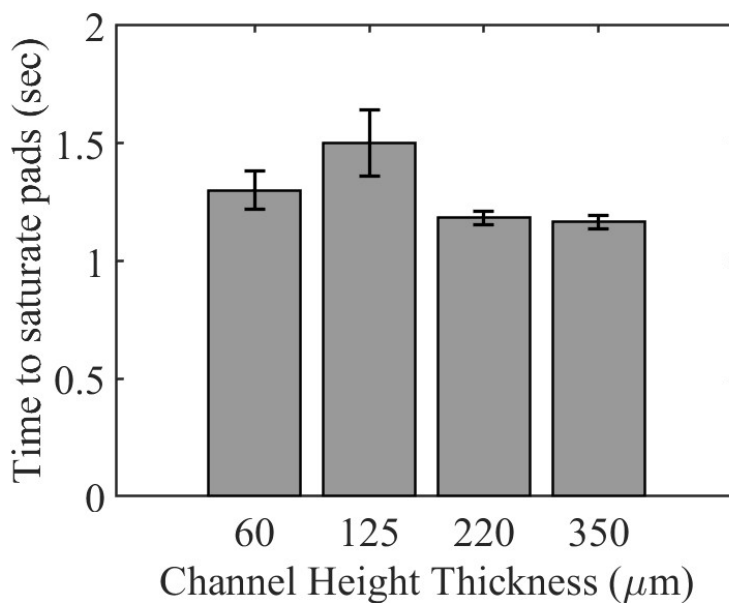

**Figure S4.** Channel height optimization for the developed sensor. The replicate measurement seconds were rounded to the nearest 0.5.

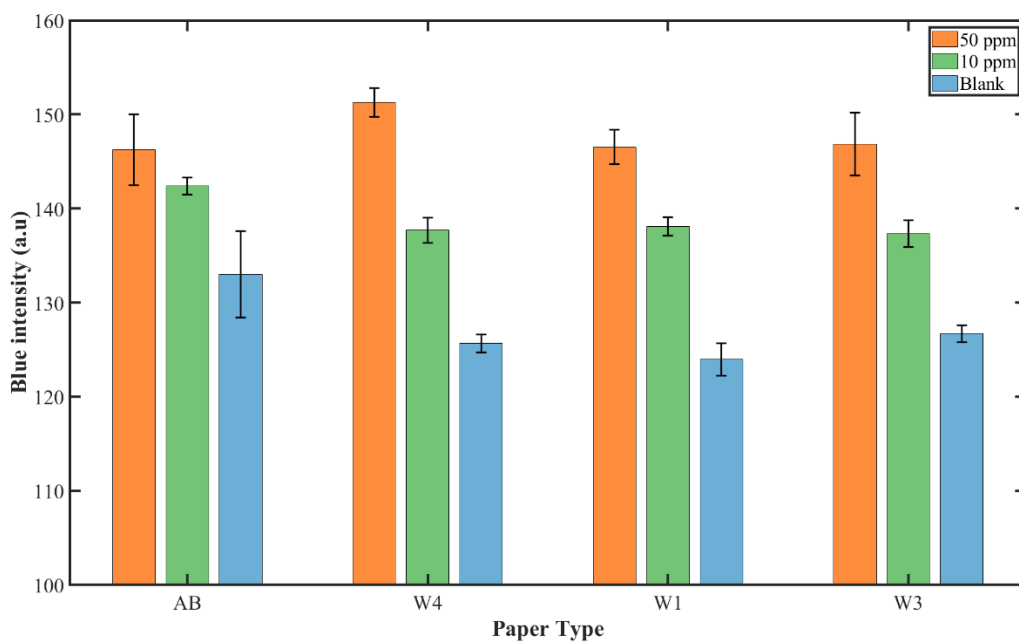

**Figure S5.** Substrate optimization on the developed sensor. W4 was chosen for its best differentiation of signal with lower SD.

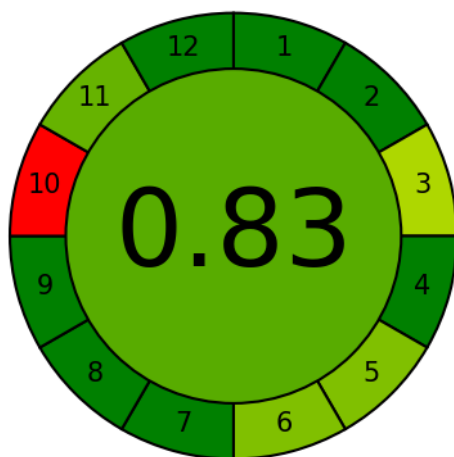

**Figure S6.** AGREE Greenness score of the developed sensor

**Table S1.** Criteria and justification for the AGREE Greenness Score of the sensor

| <b>Criterion</b>            | <b>Selection/Input</b>                | <b>Justification</b>                                                                     |
|-----------------------------|---------------------------------------|------------------------------------------------------------------------------------------|
| Direct analytical technique | In-field sampling and direct analysis | Dip-and-read workflow with no external sample handling                                   |
| Sample size                 | 0.10 mL                               | The capillary channel defines a low sample volume (~100 $\mu$ L)                         |
| Device positioning          | At-line                               | Measurement performed at sampling site, not continuous                                   |
| Sample preparation steps    | 3 or fewer                            | Integrated workflow (dip, fold, irradiate) with no external preparation                  |
| Degree of automation        | Semi-automatic                        | Minimal user input; flow and reactions proceed autonomously                              |
| Derivatization              | No                                    | Photochemical nitrosation and colorimetric reaction, but it's automated and not off-chip |
| Analytical waste            | ~0.010 mL                             | Waste is limited to a small sample and reagent volume within the device                  |
| Number of analytes          | 1                                     | Single analyte (NDMA) detection                                                          |
| Sample throughput           | ~3 samples/hour                       | Limited by ~20 min UV irradiation time                                                   |
| Energy consumption          | ~0.004 kWh                            | Low-power UV LED source and minimal smartphone use                                       |
| Renewable reagents          | No bio-based but very low volume      | The volume used is very small that is insignificant                                      |
| Toxicity/safety             | The volume used is very low           | Metal salts and acidic reagents are present in insignificant amounts                     |

**Table S2.** Physical and fluidic characteristics of paper substrates evaluated for capillary flow-driven microfluidic device detection zones. nd – no data

| <b>Material</b>                          | <b>Thickness [mm]</b> | <b>Porosity [<math>\mu</math>m]</b> | <b>Flow rate</b> | <b>Grammage [<math>\text{g m}^{-2}</math>]</b> |
|------------------------------------------|-----------------------|-------------------------------------|------------------|------------------------------------------------|
| Glass fiber                              | 0.3                   | nd                                  | nd               | ~60                                            |
| Whatman Grade 1 Chromatography Paper     | 0.180                 | nd                                  | 57 mL/min        | 87                                             |
| Whatman Grade 4 Qualitative Filter Paper | 0.205                 | 20–25                               | 247 mL/min       | 96                                             |
| Whatman Grade 3 Qualitative Filter Paper | 0.390                 | 6                                   | 28 mL/min        | 187                                            |
| Ahlstrom Blotting Paper Grade            | 0.5                   | 19                                  | 360 mL/min       | 179                                            |

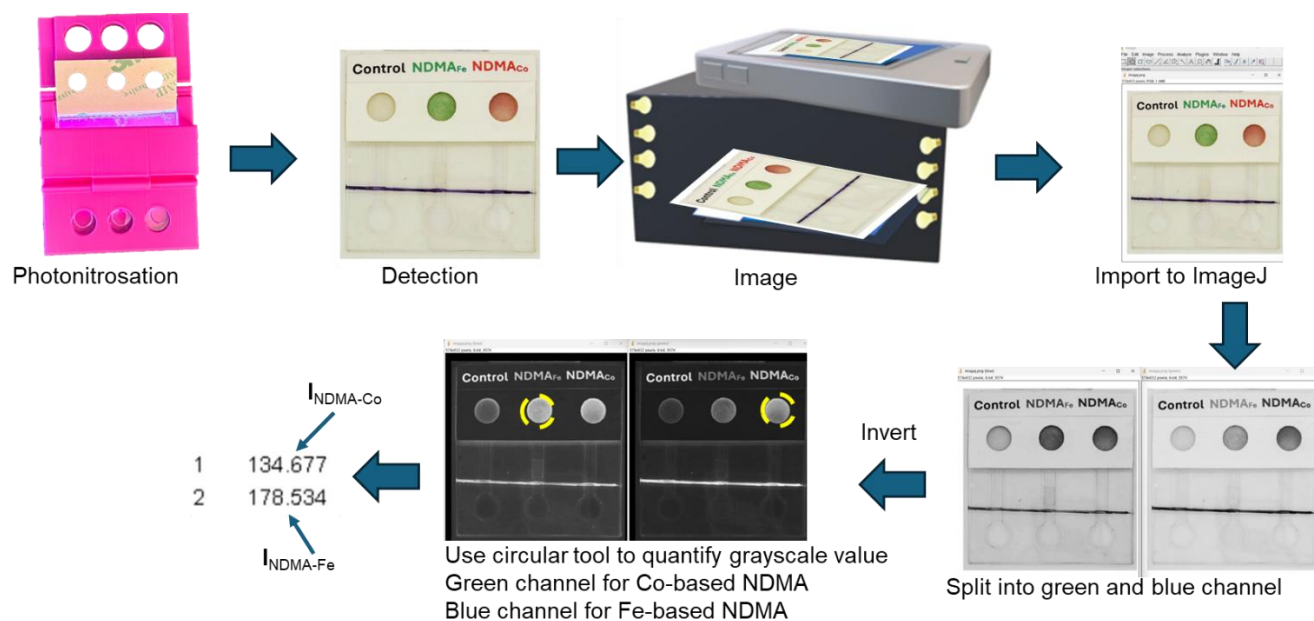

**Figure S7.** Image quantification workflow for the NDMA sensor

**Table S3.** Intra and inter-device variability in the developed system.

| System           | Intra-device (n=3) |         | Inter-device (n=3) |            |
|------------------|--------------------|---------|--------------------|------------|
|                  | NDMA (ppm)         | RSD (%) | NDMA (ppm)         | %RSD Range |
| Co <sup>2+</sup> | 5                  | 0.94    | 5                  | 6.1–8.0    |
| Co <sup>2+</sup> | 15                 | 2.19    | 15                 | 5.9–7.5    |
| Co <sup>2+</sup> | 30                 | 2.88    | 25                 | 6.9–9.4    |
| Fe <sup>2+</sup> | 15                 | 2.49    | 25                 | 9.0–9.9    |
| Fe <sup>2+</sup> | 50                 | 0.91    | 50                 | 5.7–8.8    |
| Fe <sup>2+</sup> | 70                 | 3.36    | 75                 | 6.6–9.2    |
